# Supplementary material
Source: PubMed Central journal article supplement (PMC4038790)
Supplement: supp_kfu036_toxsci-13-0881-File009.pdf [file supp_kfu036_toxsci-13-0881-File009.pdf]

## SUPPLEMENTARY FIGURE LEGENDS

**Figure S1: Human and zebrafish PPAR $\gamma$  transactivation assays of TZDs, 15d-PGJ2 and TBT.** Results of luciferase assays showing dose-response curves for rosiglitazone (A), pioglitazone (B), ciglitazone (C), troziglitazone (D) and 15deoxy- $\Delta^{12,14}$ -prostaglandin J2 (E) and TBT (F) in HG5LN-GAL4-hPPAR $\gamma$ , HG5LN-GAL4-zfPPAR $\gamma$ , HG5LN (parental cell line not transfected with chimeric nuclear receptor) reporter cell lines. Results are expressed as fold induction above control (mean  $\pm$  SD,  $n = 3$ ). At high concentration of 15d-PGJ2 (E), we observed a non-specific activation of luciferase expression, which could be due to a basal effect on the  $\beta$ -globin promoter of 15d-PGJ2. Similar non-specific activation of luciferase expression has already been reported for phytoestrogens such as genistein (Escande et al. 2006<sup>1</sup>, Katchy et al 2013<sup>2</sup>).

<sup>1</sup>Escande A, Pillon A, Servant N, Cravedi JP, Larrea F, Muhn P, Nicolas JC, Cavailles, V, Balaguer P (2006). Evaluation of ligand selectivity using reporter cell lines stably expressing estrogen receptor alpha or beta. *Biochem Pharmacol* 71(10):1459-69.

<sup>2</sup>Katchy A, Pinto C, Jonsson P, Nguyen-Vu T, Pandelova M, Riu A, Schramm KW, Samarov D, Gustafsson JA, Bondesson M, Williams C. (2013) *Toxicol. Sci.* Nov 27. (Epub ahead of print)

**Figure S2: TBBPA and TCBPA transactivation assays on HG5LN-GAL4-zfPPAR $\gamma$  and HG5LN parental cell lines.** Results of luciferase assays showing specific zfPPAR $\gamma$  activation of TBBPA (A) and TCBPA (B). Results are expressed as fold induction above control (mean  $\pm$  SD,  $n = 3$ ).

**Figure S3: Uptake and metabolism of TCBPA in zebrafish early larvae.** A: A typical HPLC-UV-chromatogram of unchanged TCBPA in embryo media (E3) and, B: a typical HPLC-UV-chromatogram from an E3 sample from wild-type zebrafish larvae exposed from 3 dpf to 1  $\mu$ M TCBPA for 72 h. C: TCBPA uptake and TCBPA-S formation kinetics recovered in E3 from zebrafish exposed from 3 dpf to TCBPA for 48 h. Results are expressed as mean  $\pm$  SD ( $n = 3$ ).

**Figure S4: Uptake and metabolism of TBBPA and TCBPA from 3 to 9 dpf.** TBBPA uptake and TBBPA-S formation kinetics recovered in E3 from zebrafish exposed to 1  $\mu$ M TBBPA (A) and 1  $\mu$ M TCBPA (B) during the obesity protocol treatment from 3 dpf to 9 dpf.
